# Supplementary material for: Plant-based CO2 drawdown and storage as SiC
Source: Royal Society of Chemistry journal article supplement (doi:10.1039/d1ra00954k), 2021-01-01
Supplement: d1ra00954k1.xlsx [file d1ra00954k1.xlsx]

## Sheet: CACLULATION
	coal	natural gas	propane	geothermal
	1.8	1.8	1.8	1.8	g SiC
	40.096	40.096	40.096	40.096	FW SiC
	44.01	44.01	44.01	44.01	FW CO2
	1.97571	1.97571	1.97571	1.97571	g CO2
	93.3	53.07	63.07	7.71		kg CO2/million Btu	https://www.eia.gov/electricity/annual/html/epa_a_03.html
	9.33e-05	5.307e-05	6.307e-05	7.71e-06		kg CO2/Btu
	3412.14	3412.14	3412.14	3412.14		Btu/kWh
	0.318353	0.181082	0.215204	0.0263076		kg CO2/kWh
	318.353	181.082	215.204	26.3076		g CO2/kWh
	0.00620604	0.0109106	0.00918064	0.0751003		kWh

## Sheet: ENERGYUSAGE
REAGENTS		ml	$/ml	$	$/kWh*	kWh		price $	size	Part	Source
TEOS		5.31915	0.0528	0.280851	0.1048	0.0294332		132.67	2.5L	Acros Chemical	UCSD Marketplace
2 M HCl		11	0.027445	0.301895	0.1048	0.0316386		109.78	4L	5 N HCl from Spectrum Chemical	UCSD Marketplace
EtOH		10	0.006866	0.06866	0.1048	0.00719557		137.32	20L	Aldon Corp via VWR	UCSD Marketplace
SUB-TOTAL						0.0682674				*average US $0.1048/kWh	https://www.eia.gov/electricity/state/
MINERALIZATION				h	kW	kWh
Heat at 60				24	0.662	15.888			662W	Cascade Tek Model TVO-2-A at 150°C	https://www.cascadetek.com/product/tvo-2-a-vacuum-automation-oven/
Vaccuum				24	0.37	8.88			370W	Welch Model 2052 Vaccuum Pump	https://www.cascadetek.com/wp-content/uploads/2018/05/Welch-Vacuum-2052-Spec.pdf
Heat at 60				24	0.662	15.888			662W	Cascade Tek Model TVO-2-A at 150°C	https://www.cascadetek.com/product/tvo-2-a-vacuum-automation-oven/
Heat at 60				16	0.662	10.592			662W	Cascade Tek Model TVO-2-A at 150°C	https://www.cascadetek.com/product/tvo-2-a-vacuum-automation-oven/
SUB-TOTAL						51.248
PETRIFICATION	°C/min	°C	min	h	kW
0to1000	6	1000	166.667	2.77778	7	19.4444				SentroTech Tube Furnace STT-1600°C-12	https://www.sentrotech.com/products/tube-furnaces/1600c-tube-furnace/
1000to1600	3	600	200	3.33333	7	23.3333				SentroTech Tube Furnace STT-1600°C-12	https://www.sentrotech.com/products/tube-furnaces/1600c-tube-furnace/
1600				2	7	14				SentroTech Tube Furnace STT-1600°C-12	https://www.sentrotech.com/products/tube-furnaces/1600c-tube-furnace/
1600to1000	2	600	300	5	7	35				SentroTech Tube Furnace STT-1600°C-12	https://www.sentrotech.com/products/tube-furnaces/1600c-tube-furnace/
1000to300	3	700	233.333	3.88889	7	27.2222				SentroTech Tube Furnace STT-1600°C-12	https://www.sentrotech.com/products/tube-furnaces/1600c-tube-furnace/
300to23	5	277	55.4	0.923333	7	6.46333				SentroTech Tube Furnace STT-1600°C-12	https://www.sentrotech.com/products/tube-furnaces/1600c-tube-furnace/
SUB-TOTAL						125.463
TOTAL ENERGY						176.78
CO2 RELEASED FOR TOTAL PROCESS
	coal	natural gas	propane	geothermal
	93.3	53.07	63.07	7.71		kg CO2/million Btu				https://www.eia.gov/electricity/annual/html/epa_a_03.html
	9.33e-05	5.307e-05	6.307e-05	7.71e-06		kg CO2/Btu
	3412.14	3412.14	3412.14	3412.14		Btu/kWh
	0.318353	0.181082	0.215204	0.0263076		kg CO2/kWh
	176.78	176.78	176.78	176.78		KWh used
	56.2783	32.0117	38.0436	4.65065		kg CO2 released
	56278.3	32011.7	38043.6	4650.65		g CO2 released
CO2 RELEASED FOR REAGENTS ONLY
	coal	natural gas	propane	geothermal
	93.3	53.07	63.07	7.71		kg CO2/million Btu				https://www.eia.gov/electricity/annual/html/epa_a_03.html
	9.33e-05	5.307e-05	6.307e-05	7.71e-06		kg CO2/Btu
	3412.14	3412.14	3412.14	3412.14		Btu/kWh
	0.318353	0.181082	0.215204	0.0263076		kg CO2/kWh
	0.0682674	0.0682674	0.0682674	0.0682674		KWh used
	0.0217331	0.012362	0.0146914	0.00179595		kg CO2 released
	21.7331	12.362	14.6914	1.79595		g CO2 released
